# Supplementary material
Source: MDPI journal article supplement (https://www.mdpi.com/2071-1050/13/5/2520)
Supplement: s1 [file s1]

| #  | Service                                                                                   | Strategic document                                                                                  |
|----|-------------------------------------------------------------------------------------------|-----------------------------------------------------------------------------------------------------|
| 1  | Gérer l'eau/Procurer un environnement écoresponsable et sain/Stimuler l'essor de la ville | Vision du développement des activités agricoles et agroalimentaires                                 |
| 2  | Gérer l'eau                                                                               | Synthèse des actions pour la protection du lac Saint-Charles et de la prise d'eau                   |
| 3  | Gérer l'eau                                                                               | Règlements sur l'environnement et l'eau de la Communauté métropolitaine de Québec                   |
| 4  | Gérer l'eau                                                                               | Bilan annuel 2018 de la qualité de l'eau potable pour la période du 1er janvier au 31 décembre 2018 |
| 5  | Gérer l'eau                                                                               | Règlement de l'agglomération sur l'eau potable                                                      |
| 6  | Gérer l'eau                                                                               | Stratégie de conservation de l'eau potable                                                          |
| 7  | Gérer l'eau/Assurer les déplacements des personnes et des biens                           | Politique de déneigement                                                                            |
| 8  | Assurer les déplacements des personnes et des biens                                       | Rapport de consultation publique RSTC                                                               |
| 9  | Assurer les déplacements des personnes et des biens/Bien aménager la ville                | Portrait de la mobilité sur le territoire de l'agglomération de Québec                              |
| 10 | Assurer les déplacements des personnes et des biens/Bien aménager la ville                | Vision des déplacements à vélo                                                                      |
| 11 | Assurer les déplacements des personnes et des biens                                       | Politique d'aliénation des immeubles industriels municipaux                                         |
| 12 | Assurer les déplacements des personnes et des biens/Bien aménager la ville                | Plan de mobilité durable                                                                            |

|    |                                                                                                         |                                                                                                                         |
|----|---------------------------------------------------------------------------------------------------------|-------------------------------------------------------------------------------------------------------------------------|
| 13 | Assurer les déplacements des personnes et des biens/Bien aménager la ville/Assurer la sécurité urbaine  | Stratégie de sécurité routière                                                                                          |
| 14 | Assurer les déplacements des personnes et des biens/Assurer la sécurité urbaine                         | Plan de sécurité civile 2019                                                                                            |
| 15 | /Stimuler l'essor de la villeAssurer les déplacements des personnes et des biens/Bien aménager la ville | Rues conviviales                                                                                                        |
| 16 | Assurer les déplacements des personnes et des biens/Assurer la sécurité urbaine                         | Plan d'action 2017-2020 pour l'accessibilité universelle, les personnes âgées et les personnes ayant des incapacités    |
| 17 | Assurer les déplacements des personnes et des biens                                                     | Plan d'action pour l'accessibilité universelle RTC - Améliorer l'accessibilité du transport en commun régulier à Québec |
| 18 | Bien aménager la ville/Stimuler l'essor de la ville                                                     | Schéma d'aménagement et de développement                                                                                |
| 19 | Bien aménager la ville/Stimuler l'essor de la ville                                                     | Programme particulier d'urbanisme                                                                                       |
| 20 | Bien aménager la ville/Assurer la sécurité urbaine/Stimuler l'essor de la ville                         | Plan directeur d'aménagement et de développement (PDAD)                                                                 |
| 21 | Bien aménager la ville/Stimuler l'essor de la ville                                                     | Visions d'aménagement                                                                                                   |
| 22 | Bien aménager la ville                                                                                  | Vision de l'habitation                                                                                                  |
| 23 | Bien aménager la ville/Procurer un environnement écoresponsable et sain                                 | Vision de l'arbre                                                                                                       |
| 24 | Bien aménager la ville                                                                                  | Rêvons nos rivières                                                                                                     |
| 25 | Bien aménager la ville                                                                                  | Capital climat                                                                                                          |

|    |                                                  |                                                                                                                       |
|----|--------------------------------------------------|-----------------------------------------------------------------------------------------------------------------------|
| 26 | Procurer un environnement écoresponsable et sain | Vision 2018-2028 pour une saine gestion des matières résiduelles                                                      |
| 27 | Procurer un environnement écoresponsable et sain | Tableau des actions (lié à la Vision 2018-2023 pour une saine gestion des matières résiduelles)                       |
| 28 | Procurer un environnement écoresponsable et sain | Plan de réduction des gaz à effet de serre (PRGES) 2011-2020                                                          |
| 29 | Procurer un environnement écoresponsable et sain | Engagement des maires pour la sauvegarde des monarques                                                                |
| 30 | Procurer un environnement écoresponsable et sain | Politique québécoise de gestion des matières résiduelles                                                              |
| 31 | Procurer un environnement écoresponsable et sain | Bassin de rétention d'eau                                                                                             |
| 32 | Procurer un environnement écoresponsable et sain | Plan de protection des sources d'eau potable                                                                          |
| 33 | Procurer un environnement écoresponsable et sain | Règlement sur le bruit                                                                                                |
| 34 | Procurer un environnement écoresponsable et sain | Politique de gestion des demandes citoyens                                                                            |
| 35 | Assurer la sécurité urbaine                      | Vers des parcours sans obstacle : éléments à considérer pour favoriser l'accessibilité des espaces publics extérieurs |
| 36 | Assurer la sécurité urbaine                      | Vision du développement social                                                                                        |
| 37 | Assurer la sécurité urbaine                      | Démarche Municipalité amie des aînés                                                                                  |
| 38 | Assurer la sécurité urbaine                      | Politique et plan d'action — Vieillir et vivre ensemble - Chez soi, dans sa communauté, au Québec                     |

|    |                                                          |                                                                                                      |
|----|----------------------------------------------------------|------------------------------------------------------------------------------------------------------|
| 39 | Assurer la sécurité urbaine                              | Intégration des personnes vivant une situation de handicap : état de situation et plan d'action 2008 |
| 40 | Assurer la sécurité urbaine/Animer et soutenir le milieu | Politique familiale                                                                                  |
| 41 | Assurer la sécurité urbaine                              | Politique en matière d'activités physiques, sportives et de plein air                                |
| 42 | Assurer la sécurité urbaine                              | Politique de consultation publique                                                                   |
| 43 | Assurer la sécurité urbaine                              | Politique de sécurité urbaine                                                                        |
| 44 | Assurer la sécurité urbaine                              | Programme égalité 5                                                                                  |
| 45 | Assurer la sécurité urbaine                              | Schéma de couverture de risques en incendie                                                          |
| 46 | Stimuler l'essor de la ville                             | Vision entrepreneuriale Québec 2023                                                                  |
| 47 | Stimuler l'essor de la ville                             | Rapport du Groupe de travail sur l'environnement économique des entreprises à Québec                 |
| 48 | Stimuler l'essor de la ville                             | Plan d'action - Enjeux de main-d'oeuvre et d'immigration                                             |
| 49 | Stimuler l'essor de la ville                             | Politique d'investissement                                                                           |
| 50 | Stimuler l'essor de la ville                             | Politique d'investissement du Fonds de développement des territoires                                 |
| 51 | Stimuler l'essor de la ville                             | Plan commerce 2017-2020                                                                              |

|    |                              |                                                                                                                     |
|----|------------------------------|---------------------------------------------------------------------------------------------------------------------|
| 52 | Stimuler l'essor de la ville | Politique d'investissement de la stratégie de développement économique                                              |
| 53 | Stimuler l'essor de la ville | Stratégie de développement économique                                                                               |
| 54 | Stimuler l'essor de la ville | Programmes, plan, politique OTQ                                                                                     |
| 55 | Animer et soutenir le milieu | Vision du patrimoine 2017-2027                                                                                      |
| 56 | Animer et soutenir le milieu | Vision du développement de la pratique culturelle amateur                                                           |
| 57 | Animer et soutenir le milieu | Vision du développement culturel 2025                                                                               |
| 58 | Animer et soutenir le milieu | Vision du développement de l'art public de la Ville de Québec 2013-2020 (une nouvelle version sera publiée en 2019) |
| 59 | Animer et soutenir le milieu | Programme d'art public pour la Ville de Québec                                                                      |
| 60 | Animer et soutenir le milieu | Vision du développement de la Bibliothèque de Québec 2013-2020                                                      |
| 61 | Animer et soutenir le milieu | Politique de reconnaissance des organismes                                                                          |
| 62 | Bien administrer la ville    | Politique d'approvisionnements                                                                                      |
| 63 | Bien administrer la ville    | Politique de sécurité de l'information                                                                              |
| 64 | Bien administrer la ville    | Politique de gestion intégrée des documents                                                                         |

|    |                           |                                                                                                                                          |
|----|---------------------------|------------------------------------------------------------------------------------------------------------------------------------------|
| 65 | Bien administrer la ville | Politique de gestion contractuelle                                                                                                       |
| 66 | Bien administrer la ville | Politique relative aux besoins des services et des arrondissements pour l'acquisition et la location d'équipements motorisés (pas suivi) |
| 67 | Bien administrer la ville | Politique sur l'utilisation sécuritaire des véhicules et équipements motorisés                                                           |
| 68 | Bien administrer la ville | Politique de confidentialité et de sécurité de l'information                                                                             |
| 69 | Bien administrer la ville | Politique d'utilisation des technologies de l'information et des télécommunications                                                      |
| 70 | Bien administrer la ville | Politique concernant les frais de représentation et de déplacement                                                                       |
| 71 | Bien administrer la ville | Politique de capitalisation, d'amortissement et de financement des immobilisations                                                       |
| 72 | Bien administrer la ville | Politique d'utilisation des outils et services du Web 2.0 à la Ville de Québec                                                           |
| 73 | Bien administrer la ville | Politique de fermeture de règlements d'emprunt                                                                                           |
| 74 | Bien administrer la ville | Politique de financement des régimes de retraite                                                                                         |
| 75 | Bien administrer la ville | Politique de gestion de la dette                                                                                                         |
| 76 | Bien administrer la ville | Politique de gestion de réserves financières et des surplus affectés                                                                     |
| 77 | Bien administrer la ville | Politique de placement de l'encaisse                                                                                                     |

|    |                           |                                                                                                    |
|----|---------------------------|----------------------------------------------------------------------------------------------------|
| 78 | Bien administrer la ville | Politique d'investissements                                                                        |
| 79 | Bien administrer la ville | Politique sur la gestion des petites caisses                                                       |
| 80 | Bien administrer la ville | Politique d'utilisation du matériel municipal par le personnel de la Ville                         |
| 81 | Bien administrer la ville | Politique de gestion intégrée de la présence au travail                                            |
| 82 | Bien administrer la ville | Politique d'embauche des étudiants - culture, loisir et vie communautaire dans les arrondissements |
| 83 | Bien administrer la ville | Politique et procédure de dotation                                                                 |
| 84 | Bien administrer la ville | Politique et procédures sur la Ligne de signalement fraude et inconduite                           |
| 85 | Bien administrer la ville | Politique pour un climat de travail sain                                                           |
| 86 | Bien administrer la ville | Politique santé, sécurité et mieux-être au travail                                                 |
| 87 | Bien administrer la ville | Code éthique                                                                                       |
| 88 | Bien administrer la ville | Rapport de recommandation du VG                                                                    |
| 89 | Bien administrer la ville | Rôle d'évaluation                                                                                  |
